# Supplementary material
Source: MDPI journal article supplement (https://www.mdpi.com/2504-477X/7/11/452)
Supplement: s1 [file s1]

# Investigations of Activated Carbon from Different Natural Sources for Preparation of Binder-Free Few-Walled CNTs/Activated Carbon Electrodes

Azamat Taurbekov 1,2,3, Alisher Abdisattar 1,4, Meiram Atamanov 1,2, Bayan Kaidar 1, Mukhtar Yeleuov 1,3,4, Reza Joia 2, Rachid Amrousse 5, Tolganay Atamanova 1,2,\*

1 Institute of Combustion Problems, 172 Bogenbay Batyr Str., Almaty 050012, Kazakhstan;

a.taurbek@gmail.com (A.T.); alisher.abdisattar@inbox.ru (A.A.); amk1310@mail.ru (M.A.);

kaydar.bayan@gmail.com (B.K.); mukhtar.yu@gmail.com (M.Y.)

2 Faculty of Chemistry and Chemical Technology, Al Farabi Kazakh National University, 71 Al-Farabi Ave., Almaty 050040, Kazakhstan; joia.reza@yahoo.com

3 Bes Saiman Group, 171a Zharokov Str., Almaty 050057, Kazakhstan

4 Institute of Combustion Problems, Satbayev University, 22a Satpaev Str., Almaty 050013, Kazakhstan

5 Faculty of Sciences, University of Chouaib Doukkali, El Jadida 24000, Morocco; rachid.amrousse@gmail.com

\* Correspondence: tolganay.temirgaliyeva@gmail.com

Table S1. Comparison of the electrochemical performance of the electrodes of the present work with other works.

| Electrodes                          | Electrolyte                         | Specific capacitance (GCD)                     |
|-------------------------------------|-------------------------------------|------------------------------------------------|
| Cotton [a]                          | 6 M KOH                             | 92 F/g at 0.1 A/g                              |
| Bacterial cellulose [b]             | 6 M KOH                             | 184 F/g at 0.25 A/g                            |
| Lignin (GO/lignin carbon films) [c] | 1 M H <sub>2</sub> SO <sub>4</sub>  | 165 F/g at 20 A/g                              |
| Cellulose acetate (CFs)[d]          | 6 M KOH                             | 280 F/g at 0.1 A/g                             |
| Basewood [e]                        | 4 M KOH                             | 135 F/g at 0.2 A/g                             |
| Chitin [f]                          | 1 M H <sub>2</sub> SO <sub>4</sub>  | 138 F/g at 0.92 A/g                            |
| AK                                  | 1 M Li <sub>2</sub> SO <sub>4</sub> | 118.1 F/g <sup>-1</sup> at 1 A g <sup>-1</sup> |
| RH                                  | 1 M Li <sub>2</sub> SO <sub>4</sub> | 125.6 F/g <sup>-1</sup> at 1 A g <sup>-1</sup> |
| WSh                                 | 1 M Li <sub>2</sub> SO <sub>4</sub> | 105.7 F/g 1 A g <sup>-1</sup>                  |

- Xie, Q.; Wu, S.; Zhang, Y.; Zhao, P. Nitrogen-enriched flexible porous carbon/graphene composite cloth as free-standing electrodes for high performance aqueous supercapacitors. *J. Electroanal. Chem.* **2017**, *801*, 57–64, <https://doi.org/10.1016/j.jelechem.2017.07.031>.
- Hao, X.; Wang, J.; Ding, B.; Wang, Y.; Chang, Z.; Dou, H.; Zhang, X. Bacterial-cellulose-derived interconnected meso-microporous carbon nanofiber networks as binder-free electrodes for high-performance supercapacitors. *J. Power Sources* **2017**, *352*, 34–41, <https://doi.org/10.1016/j.jpowsour.2017.03.088>.
- Tran, C.D.; Ho, H.C.; Keum, J.K.; Chen, J.; Gallego, N.C.; Naskar, A.K. Sustainable Energy-Storage Materials from Lignin-Graphene Nanocomposite-Derived Porous Carbon Film. *Energy Technol.* **2017**, *5*, 1927–1935, <https://doi.org/10.1002/ente.201700090>.
- Ma, C.; Chen, J.; Fan, Q.; Guo, J.; Liu, W.; Cao, E.; Shi, J.; Song, Y. Preparation and one-step activation of nanoporous ultrafine carbon fibers derived from polyacrylonitrile/cellulose blend for used as supercapacitor electrode. *J. Mater. Sci.* **2017**, *53*, 4527–4539, <https://doi.org/10.1007/s10853-017-1887-7>.
- Tang, Z.; Pei, Z.; Wang, Z.; Li, H.; Zeng, J.; Ruan, Z.; Huang, Y.; Zhu, M.; Xue, Q.; Yu, J.; et al. Highly anisotropic, multichannel wood carbon with optimized heteroatom doping for supercapacitor and oxygen reduction reaction. *Carbon* **2018**, *130*, 532–543, <https://doi.org/10.1016/j.carbon.2018.01.055>.
- Nguyen, T.-D.; Shpopsowitz, K.E.; MacLachlan, M.J. Mesoporous nitrogen-doped carbon from nanocrystalline chitin assemblies. *J. Mater. Chem. A* **2014**, *2*, 5915–5921, <https://doi.org/10.1039/c3ta15255c>.
